# Supplementary material for: Thermally responsive morphological changes of layered coordination polymers induced by disordering/ordering of flexible alkyl chains
Source: Royal Society of Chemistry journal article supplement (doi:10.1039/d2dt03142f), 2022-01-01
Supplement: d2dt03142f2.pdf [file d2dt03142f2.pdf]

## ***Supporting Information***

### **Thermally responsive morphological change of layered coordination polymer induced by disordering/ordering of flexible alkyl chains**

Kenichiro Omoto,<sup>\*a</sup> Shota Aoyama,<sup>a</sup> Tomasz Galica,<sup>b</sup> Eiji Nishibori,<sup>b</sup> Shohei Katao,<sup>a</sup>  
Kazuma Yasuhara,<sup>a,c</sup> and Gwénaél Rapenne<sup>a,d</sup>

<sup>a</sup> *Division of Materials Science, Nara Institute of Science and Technology (NAIST), 8916-5 Takayama-cho, Ikoma, 630-0192, Japan. omoto@ms.naist.jp*

<sup>b</sup> *Department of Physics, Faculty of Pure and Applied Sciences, Tsukuba Research Center for Energy Materials Science (TREMS), University of Tsukuba, 1-1-1 Tennodai, Tsukuba, Ibaraki 305-8571, Japan*

<sup>c</sup> *Center for Digital Green-innovation, Nara Institute of Science and Technology (NAIST), 8916-5 Takayama-cho, Ikoma, 630-0192, Japan*

<sup>d</sup> *CEMES, Université de Toulouse, CNRS, 29 Rue Marvig, F-31055 Toulouse Cedex 4, France*

|                                               |          |
|-----------------------------------------------|----------|
| <b>1. Abbreviation</b>                        | page S2  |
| <b>2. Materials and methods</b>               | page S2  |
| <b>3. Preparation of coordination polymer</b> | page S4  |
| <b>4. Experimental data</b>                   | page S5  |
| <b>5. References</b>                          | page S19 |

## 1. Abbreviation

DSC: differential scanning calorimetry, DTA: differential thermal analysis, OAc: -OCOCH<sub>3</sub>, PXRD: powder X-ray diffraction, SEM: scanning electron microscope, SCXRD: single crystal X-ray diffraction, TGA: thermogravimetric analysis, XRD: X-ray diffraction.

## 2. Materials and methods

### Materials

All solvents, organic and inorganic reagents are commercially available and were used without further purification. Organic ligand (H<sub>2</sub>C16) was prepared according to previously reported procedures.<sup>1</sup>

### Single-crystal X-ray crystallographic analysis using MoK $\alpha$ radiation

Single crystal X-ray crystallographic analysis was performed using a Rigaku VariMax RAPID (1.2kW) diffractometer with confocal mirror optics MoK $\alpha$  radiation. Single crystals for diffraction measurement were mounted with epoxy resin on a glass fiber, the temperature of which was controlled using a nitrogen gas-flow. Crystal structures were solved with SHELXT<sup>2</sup> and L.S refinement was performed with SHELXL<sup>3</sup> within Olex2 GUI.<sup>4</sup> Hydrogen atoms were refined using the riding model.

### Single-crystal X-ray crystallographic analysis using synchrotron

Single crystal X-ray diffraction data was collected at SPring-8, BL02B1 with wavelength 0.24792 Å. Data integration, scaling and multi-scan absorption corrections were carried out with CrysAlisPro<sup>5</sup>. For **HT**, all non-hydrogen atoms were refined anisotropically and hydrogen atoms were treated geometrically with HFIX 43, 23 and 133. **HT** required the following restraints and constraints: FLAT, DANG, ISOR, DELU. C<sub>16</sub>-alkyl chain of **HT** was treated as a rigid fragment, with PART-1. Initial orientation of the chain was assigned basing on two positive electron density peaks for atoms C15 and C16.

### Powder X-ray diffraction (PXRD) measurements using CuK $\alpha$ radiation

PXRD analysis was carried out using a Rigaku SmartLab (9kW, CuK $\alpha$ ) diffractometer equipped with a HyPix-3000 as a detector. Samples for diffraction measurement were placed on an oriented silicon plate or a glass plate. For the measurement under controlled temperature condition, an Anton Paar DHS 1100 sample stage was used. The sample was covered with a carbon dome and vacuumed during measurements.

### Powder X-ray diffraction (PXRD) measurements using synchrotron

Synchrotron PXRD measurements carried out at SPring-8, BL02B2 beam line using a Large Debye Scherrer camera with an imaging plate as a detector. The samples (crystals of ZnC16) were installed in a

glass capillary, the temperature of which was controlled using a nitrogen gas-flow high temperature device. An exposure time of X-ray for each profile was 5 min. The CeO<sub>2</sub> (NIST SRM674a) standard powder was used for wavelength calibration. The wavelength was 0.78 Å.

#### **Thermogravimetric analysis and differential thermal analysis (TGA/DTA)**

TGA/DTA were performed using a Hitachi STA7200 under dried air. Samples (crystals of ZnC16) for the measurement were placed in standard aluminum pan and scanned at a heating rate of 1 °C/min in the temperature range of rt to 500 °C.

#### **Differential scanning calorimetry (DSC) measurement**

DSC measurements were performed using a Hitachi DSC7000X under N<sub>2</sub> atmosphere. Samples (crystals of ZnC16) for the measurement were placed in standard aluminum pan crimped with a cover and scanned at a heating/cooling rate of 1 °C/min in the temperature range of 130 to 170 °C.

#### **Raman spectroscopy**

Raman spectrum of the crystals of ZnC16 were collected using a JACSO NRS-4100-30 spectrometer using laser of 532 nm for excitation. The sample was placed on a glass plate, the temperature of which was controlled using a Linkam 10083L sample stage.

#### **Observation of crystal using optical microscope**

Microscopic images of the crystals of ZnC16 were collected using an Olympus BX51 attached with a Mettler HS82 sample stage.

#### **Observation of crystal using scanning electron microscope (SEM)**

SEM images of the crystals of ZnC16 before/after one cycle of thermal phase transition were collected using a Hitachi SU6600. The samples were attached on a metal plate using conductive tape. Sample after one cycle of phase transition was prepared by heating and cooling the crystals of ZnC16 in the 30–170 °C temperature range using DSC (heating/cooling rate: 1 °C/min).

### 3. Preparation of coordination polymer ZnC16

#### Procedure

5-(*n*-Hexadecyloxy)-isophthalic acid (**H<sub>2</sub>C16**) (300.9 mg, 0.74 mmol, 1 eq) was dissolved in hot MeOH (37 mL) to give a colourless solution. To this solution was added a solution of Zn(OAc)<sub>2</sub>·2H<sub>2</sub>O (20 mM, 37 mL, 0.74 mmol, 1 eq). After incubating the resulted colourless suspension at 60 °C for 7 days, colourless prismatic single crystals suitable for single crystal X-ray diffraction analysis were formed (During the incubation process, small amount of solid sample was collected and PXRD was measured to monitor the reaction, Fig. S1). To isolate coordination polymer (**ZnC16**), the single crystals were collected by centrifugation and washed by MeOH. After being kept under reduced pressure at room temperature, **ZnC16** (262.0 mg, 0.56 mmol, 75%) were obtained as colourless single crystals (Fig. S5).

Elemental analysis: calcd for C<sub>25</sub>H<sub>38</sub>O<sub>4</sub>Zn (**ZnC16**): C, 61.34; H, 7.72. Found: C, 61.43; H, 7.78.

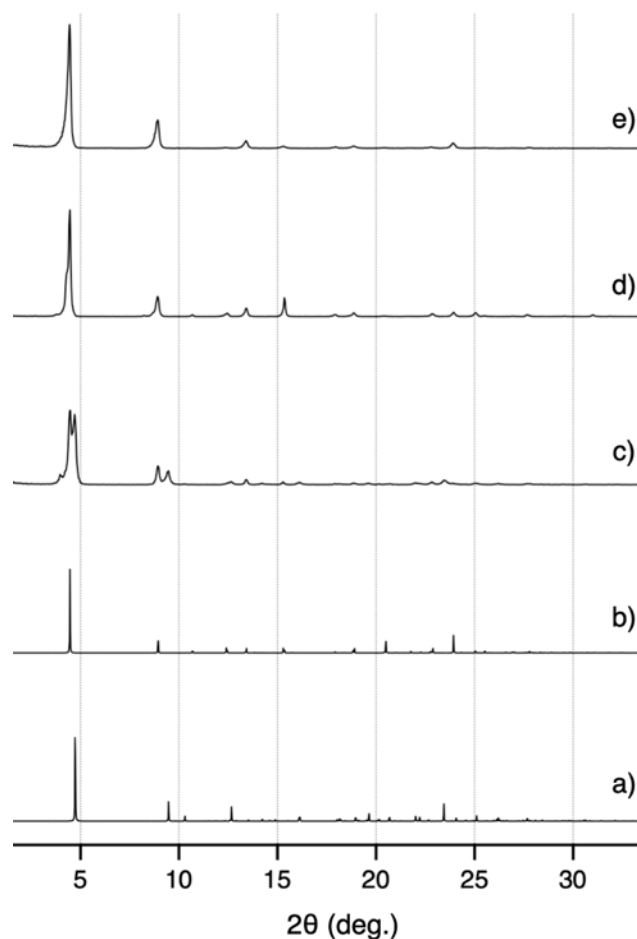

**Fig. S1** PXRD profiles of a) **ZnC16** (LT) and b) **ZnC16**(MeOH)<sub>2</sub> calculated from respective single crystal structures at 20 °C. PXRD profiles (CuKα, λ = 1.541 Å, r.t.) of the a) solid samples formed after incubation of the mixture of **H<sub>2</sub>C16** and Zn(OAc)<sub>2</sub>·2H<sub>2</sub>O in MeOH at 60 °C for c) 2 days and d) 7 days. e) PXRD profiles of **ZnC16** (LT) isolated as single crystals.

## 4. Experimental data

### 4.1. Single crystal structure of solvated coordination polymer $\text{ZnC16}(\text{MeOH})_2$

#### Crystal data for $\text{ZnC16}(\text{MeOH})_2$ at 293 K (20 °C)

Crystal data for  $\text{C}_{26}\text{H}_{44}\text{O}_7\text{Zn}$ :  $F_w = 533.98$ , crystal dimensions  $0.2 \times 0.1 \times 0.03$  mm, triclinic, space group  $P\bar{1}$ ,  $a = 8.0069(3)$ ,  $b = 9.7526(4)$ ,  $c = 18.8575(9)$  Å,  $\alpha = 82.319(6)$ ,  $\beta = 89.523(6)$ ,  $\gamma = 68.639(5)^\circ$ ,  $V = 1357.78(11)$  Å<sup>3</sup>,  $Z = 2$ ,  $\rho_{\text{calcd}} = 1.306$  g·cm<sup>-3</sup>,  $\mu = 0.945$  mm<sup>-1</sup>,  $T = 293$  K,  $\lambda(\text{MoK}\alpha) = 0.71075$  Å,  $2\theta_{\text{max}} = 55.0^\circ$ , 6215/4588 reflection collected/unique ( $R_{\text{int}} = 0.0497$ ),  $R_I = 0.0488$  ( $I > 2\sigma(I)$ ),  $wR_2 = 0.1262$  (for all data), GOF = 1.022, largest diff. peak and hole 0.463/−0.409 eÅ<sup>-3</sup>. CCDC deposit number 2201471.

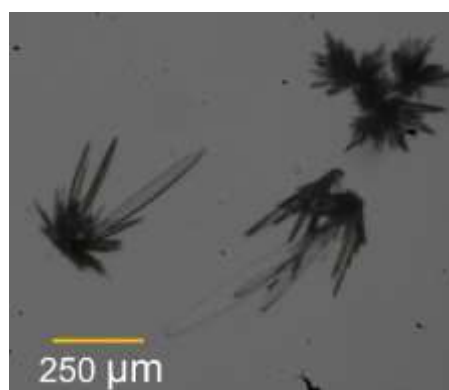

**Fig. S2** Microscopic image of  $\text{ZnC16}(\text{MeOH})_2$ .

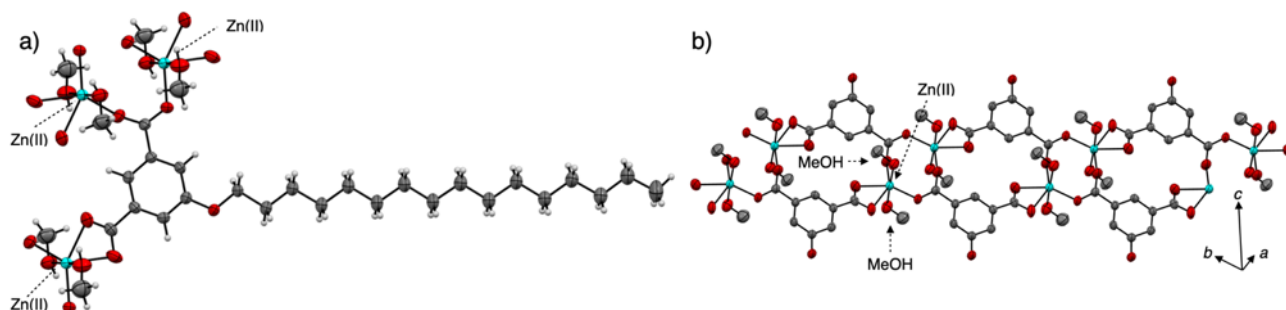

**Fig. S3** Crystal structure of  $\text{ZnC16}(\text{MeOH})_2$ . a) ORTEP view (50% probability level) of the single ligand. b) Structure of the 1D coordination polymer. Alkyl chains on Fig. S3b are omitted for clarity. (C: grey, H: white, O: red, Zn: pale blue)

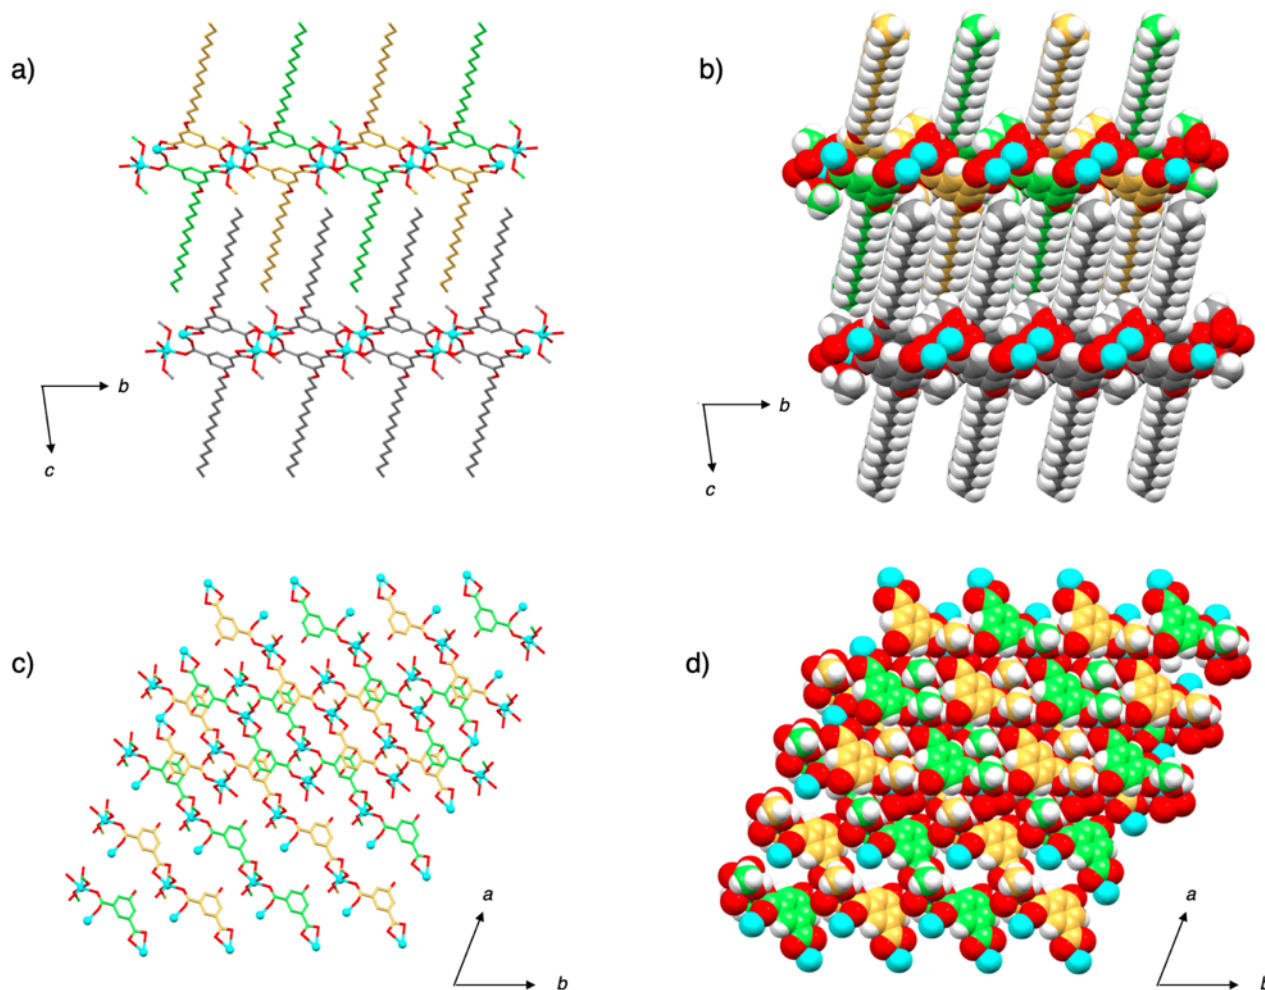

**Fig. S4** Molecular packing of  $\text{ZnC16}(\text{MeOH})_2$ . Views from  $a$ -axis with a) ball and stick model and b) space fill model. Views without showing alkyl chains from  $c$ -axis; c) ball and stick model and d) space fill model. C atoms are shown in different colours for clarity. Alkyl chains on Fig. S4c,d are omitted for clarity. (C: pale green, yellow or grey, H: white, O: red, Zn: pale blue)

## 4-2. Single crystal structure of coordination polymer ZnC16 (LT)

### Crystal data for ZnC16 (LT) at 293 K (20 °C)

Crystal data for  $C_{24}H_{36}O_5Zn$ :  $F_w = 469.90$ , crystal dimensions  $0.14 \times 0.06 \times 0.04$  mm, triclinic, space group  $P\bar{1}$ ,  $a = 7.0651(2)$ ,  $b = 9.0096(3)$ ,  $c = 20.2493(5)$  Å,  $\alpha = 78.148(5)$ ,  $\beta = 89.073(6)$ ,  $\gamma = 69.912(5)^\circ$ ,  $V = 1182.65(7)$  Å<sup>3</sup>,  $Z = 2$ ,  $\rho_{\text{calcd}} = 1.320$  g cm<sup>-3</sup>,  $\mu = 1.069$  mm<sup>-1</sup>,  $T = 293$  K,  $\lambda(\text{MoK}\alpha) = 0.71075$  Å,  $2\theta_{\text{max}} = 55.0^\circ$ , 5403/4989 reflection collected/unique ( $R_{\text{int}} = 0.0156$ ),  $R_1 = 0.0266$  ( $I > 2\sigma(I)$ ),  $wR_2 = 0.0715$  (for all data), GOF = 1.130, largest diff. peak and hole  $0.502/-0.214$  eÅ<sup>-3</sup>. CCDC deposit number 2194401.

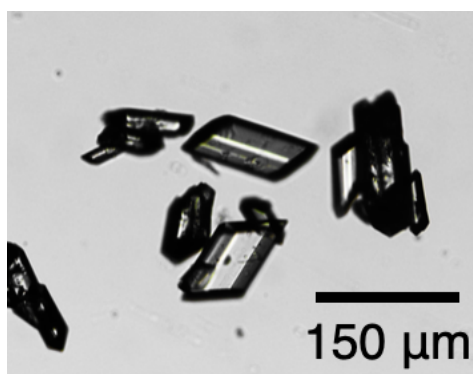

Fig. S5 Microscopic image of ZnC16 (LT) isolated as single crystals.

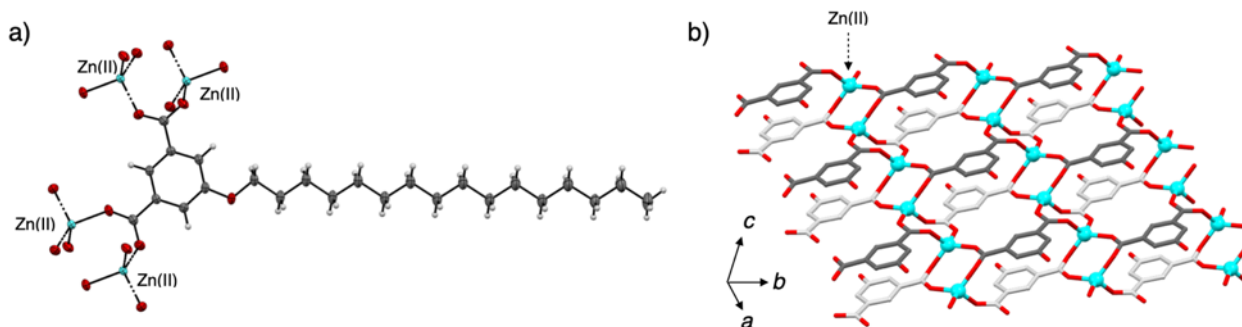

Fig. S6 Crystal structure of ZnC16 (LT). a) ORTEP view (50% probability level) of the single ligand. b) Structure of the 2D coordination polymer network. Alkyl chains on Fig. S6b are omitted for clarity. (C: grey and pale grey, H: white, O: red, Zn: pale blue)

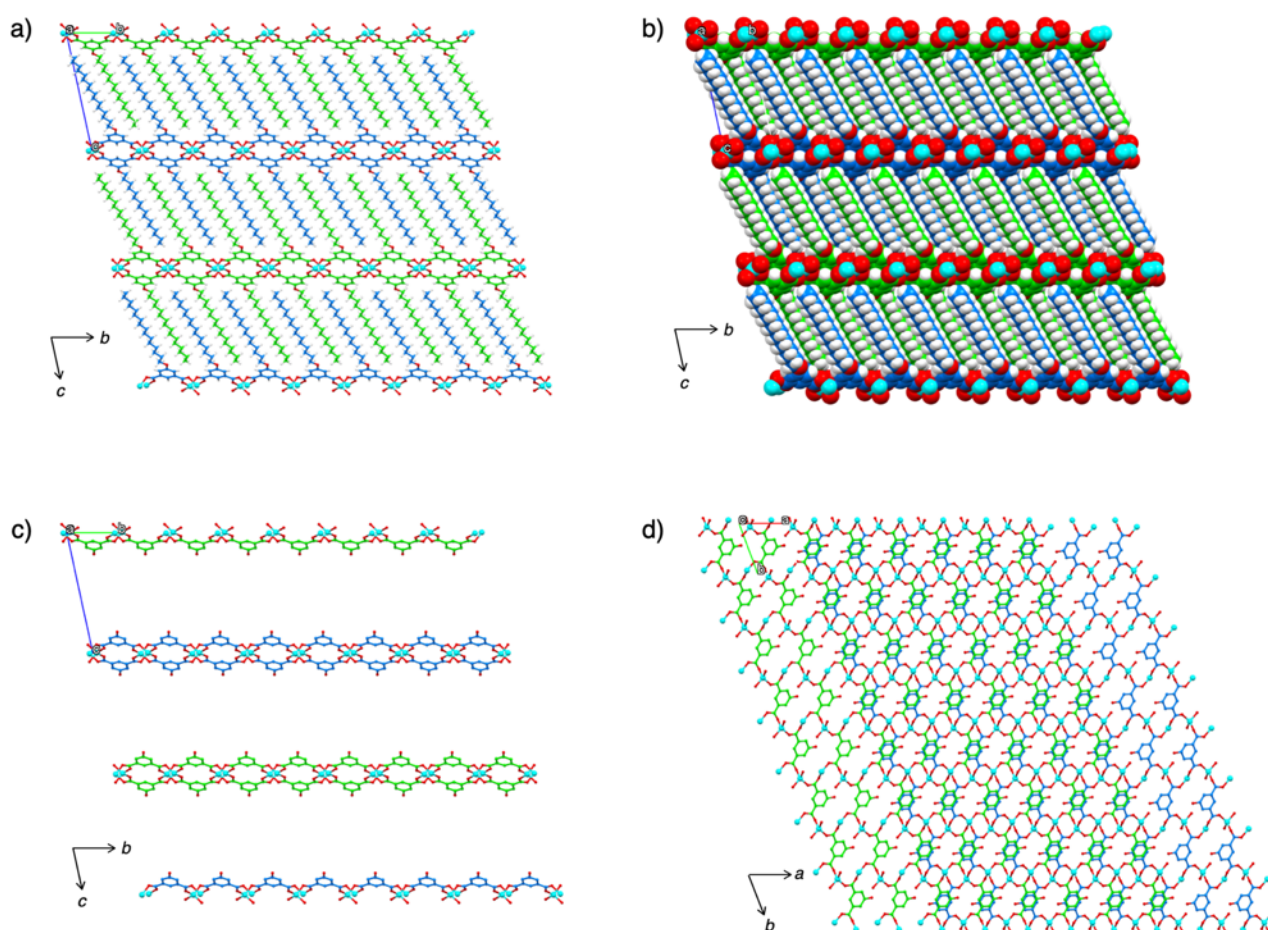

**Fig. S7** Molecular packing of **ZnC16 (LT)**. Views from *a*-axis with a) ball and stick model and b) space filling model. Views without showing alkyl chains c) from *a*-axis and d) from *c*-axis. C atoms of the adjacent layer are shown in different colours. Alkyl chains on Fig. S7c,d are omitted for clarity. (C: pale green or blue, H: white, O: red, Zn: pale blue)



#### 4-3. TGA/DTA thermograms of coordination polymer ZnC16

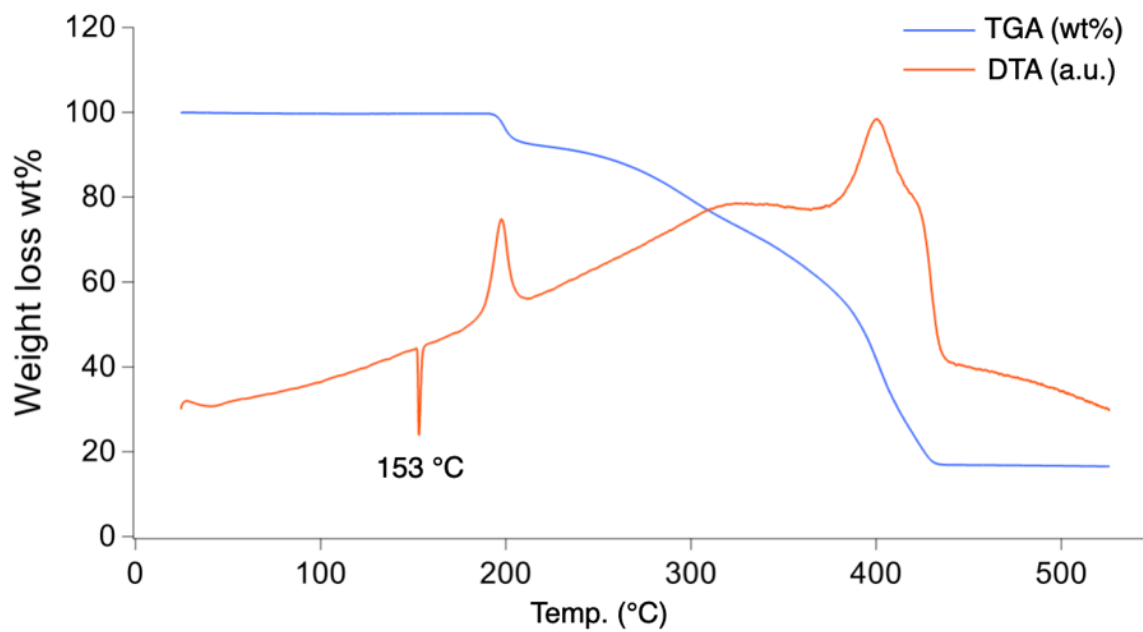

**Fig. S8** TGA/DTA thermograms of ZnC16 measured under dried air (scan rate 1 °C/min).

#### 4-4. Variable temperature PXRD of coordination polymer ZnC16

##### 4-4-1. PXRD of ZnC16 under the temperature window of 27–187 °C

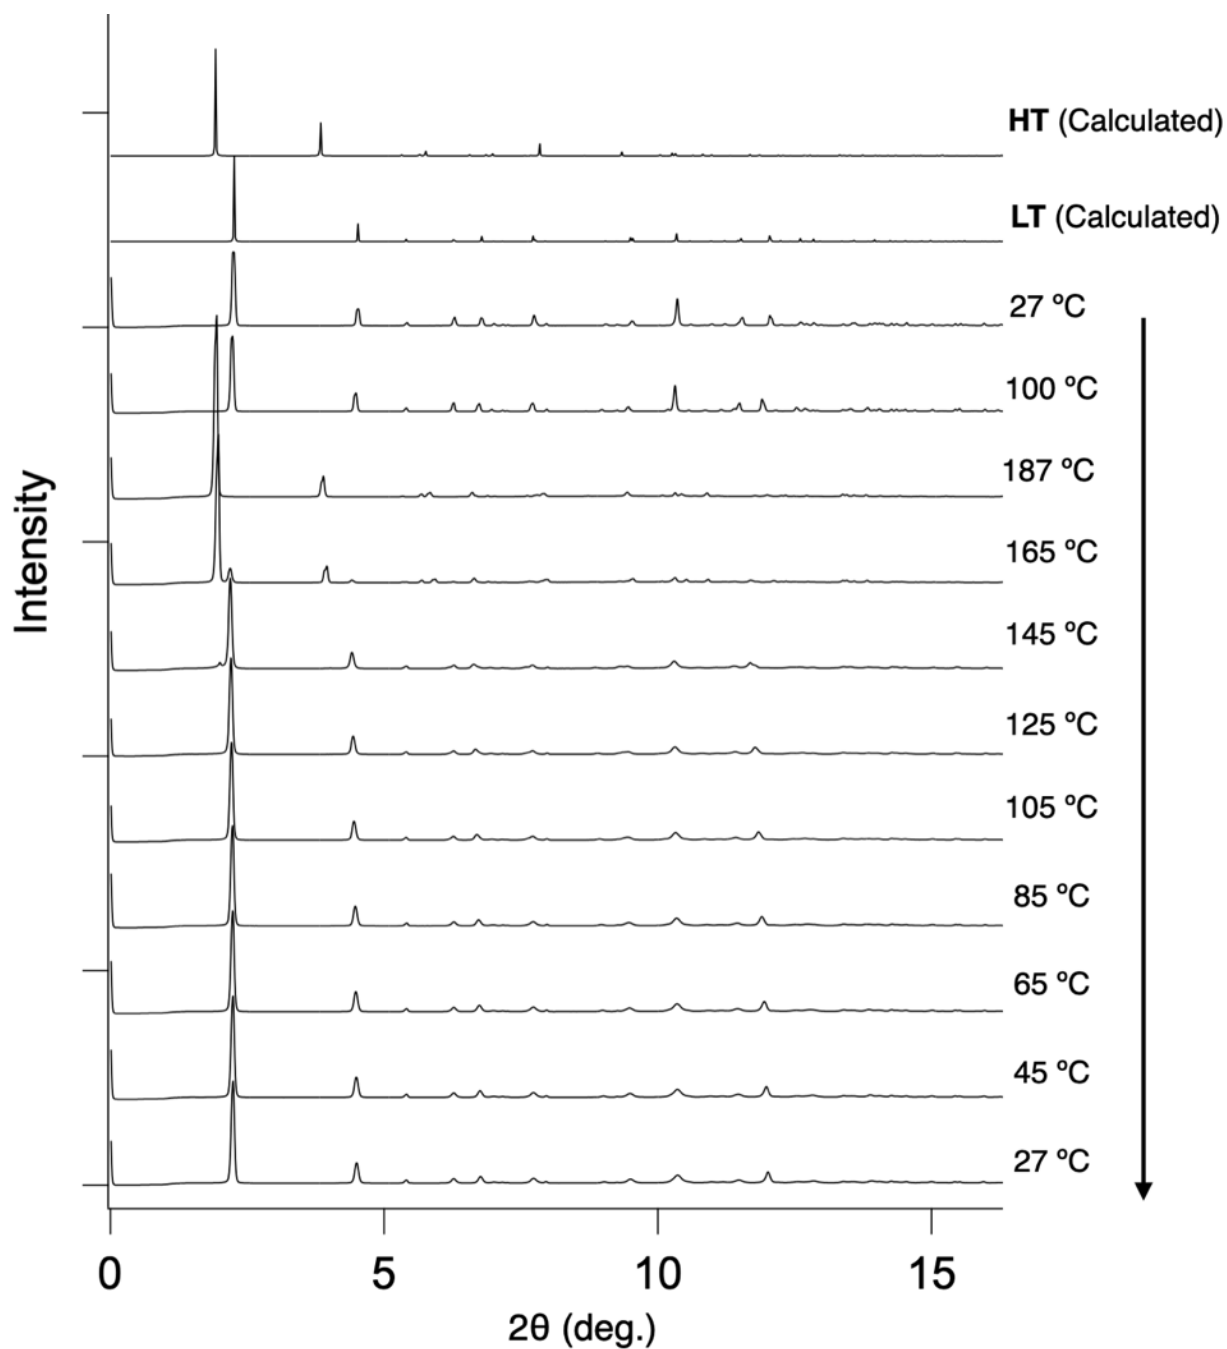

**Fig. S9** PXRD profiles ( $\lambda = 0.78 \text{ \AA}$ , synchrotron) of ZnC16 measured sequentially at 27 °C to 187 °C and back to 27 °C. The theoretical diffraction patterns of **HT** and **LT** are simulated from their single crystal structures at 20 °C and 177 °C respectively. The black arrow shows the order of the measurements.

#### 4-4-2. PXRD of ZnC16 under repetitive heating/cooling scan in the temperature window of 130–170 °C

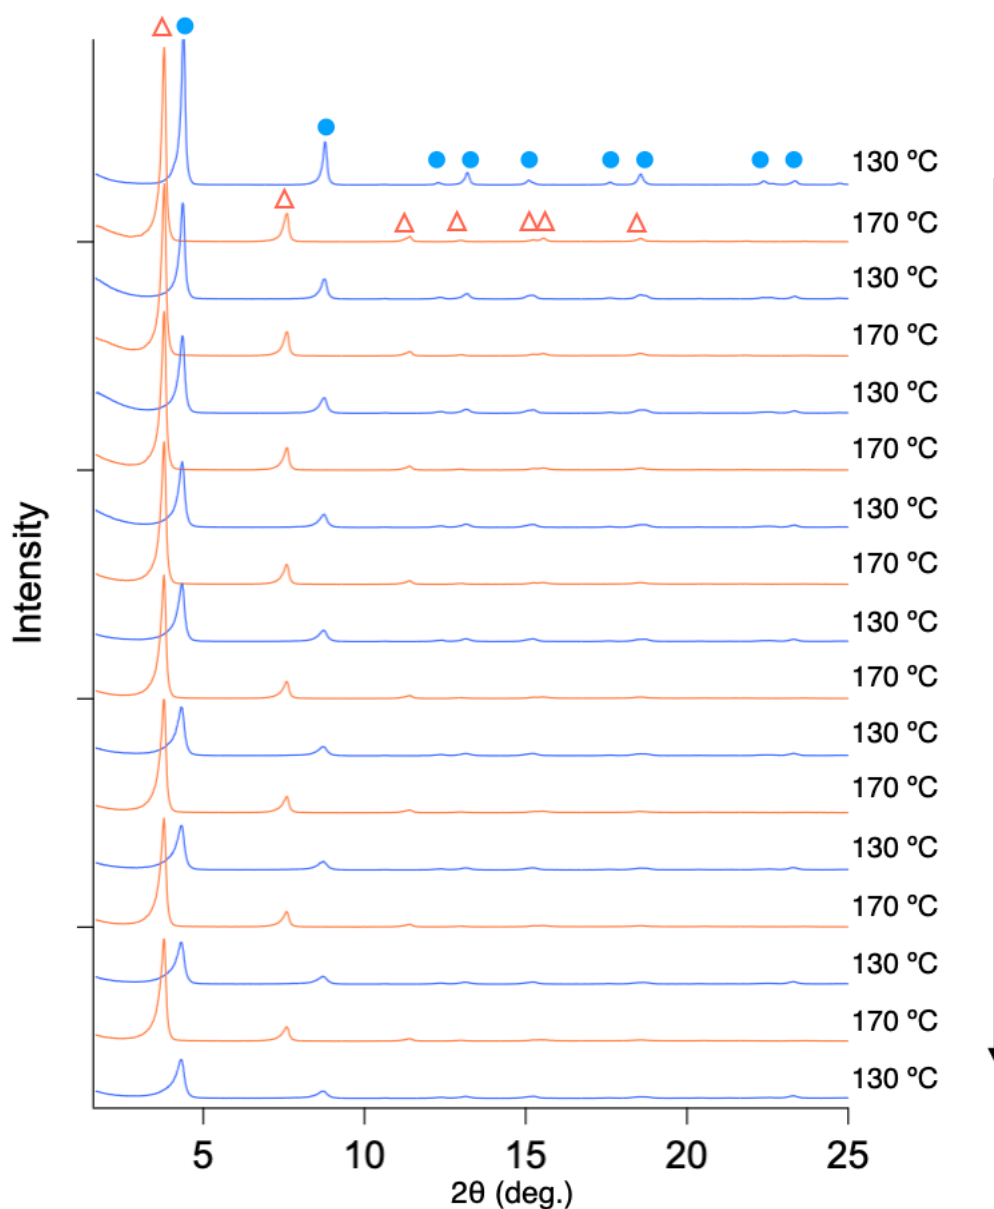

**Fig. S10** PXRD profiles ( $\lambda = 1.54 \text{ \AA}$ ,  $\text{CuK}\alpha$ ) of ZnC16 measured during repetitive temperature increasing/decreasing cycles within the 130–170 °C window. The peaks marked by blue circles and red triangles are assignable to the diffraction of **LT** and **HT** respectively. The black arrow shows the order of the measurements.

#### 4-5. Single crystal structure of coordination polymer ZnC16 (HT)

##### Crystal data for ZnC16 (HT) at 460 K (177 °C)

Crystal data for  $C_{24}H_{36}O_5Zn$ :  $F_w = 469.90$ , crystal dimensions  $0.1 \times 0.1 \times 0.1$  mm, monoclinic, space group  $C2/m$ ,  $a = 7.3454(16)$ ,  $b = 16.8251(13)$ ,  $c = 23.326(14)$  Å,  $\beta = 91.95(4)^\circ$ ,  $V = 2881.1(19)$  Å<sup>3</sup>,  $Z = 4$ ,  $\rho_{\text{calcd}} = 1.083$  g·cm<sup>-3</sup>,  $\mu = 0.063$  mm<sup>-1</sup>,  $T = 450$  K,  $\lambda(\text{MoK}\alpha) = 0.24792$  Å,  $2\theta_{\text{max}} = 14.16000^\circ$ , 3027/913 reflection collected/unique ( $R_{\text{int}} = 0.0977$ ),  $R_1 = 0.1156$  ( $I > 2\sigma(I)$ ),  $wR_2 = 0.4144$  (for all data), GOF = 1.035, largest diff. peak and hole 0.454/-0.230 eÅ<sup>-3</sup>. CCDC deposit number 2194402.

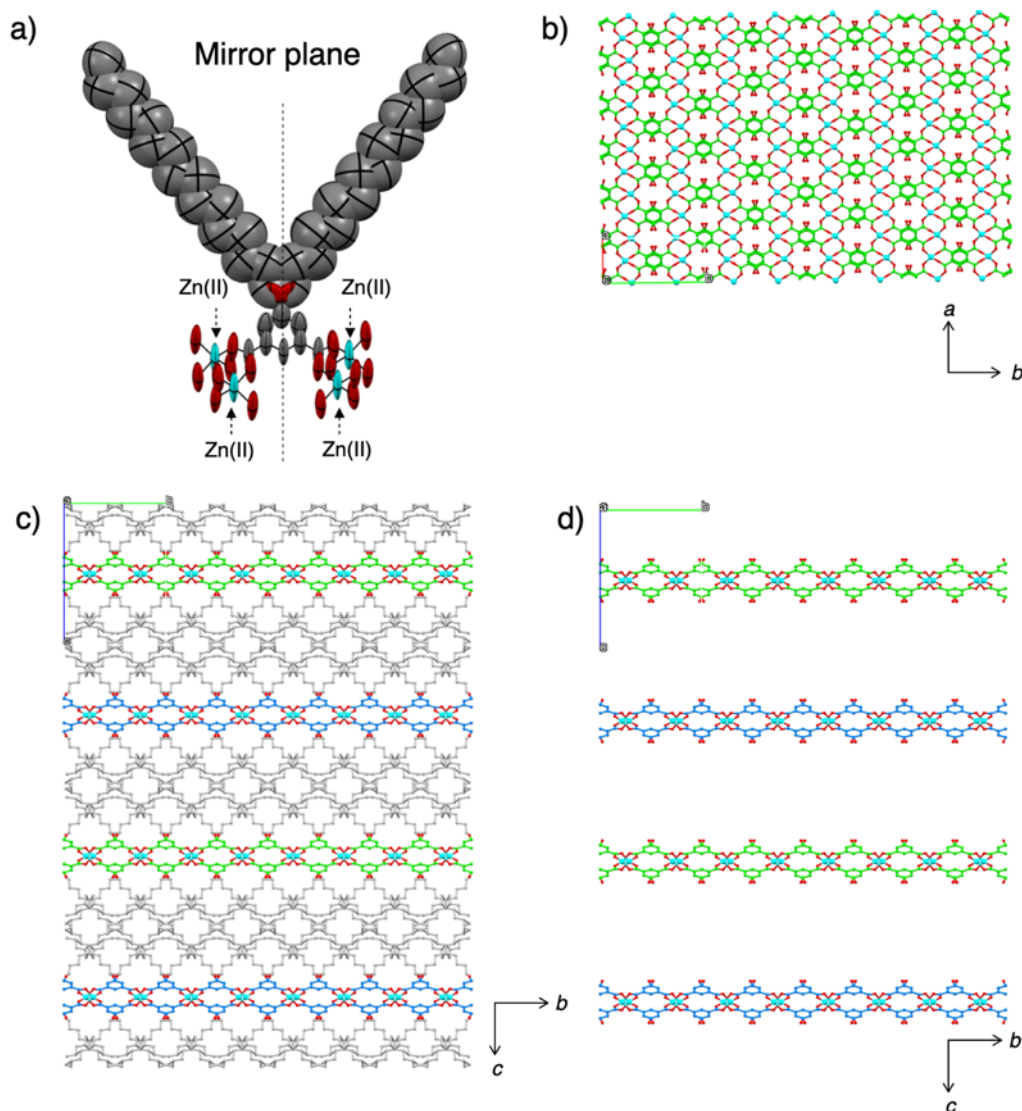

**Fig. S11** Crystal structure of ZnC16 (HT) at 177 °C. a) ORTEP view (50% probability level) of single ligand. Structure of 2D coordination polymer network. Views from b)  $c$ -axis and c,d) from  $a$ -axis with ball and stick model. C atoms of the aromatic rings of the adjacent layer are shown in different colours. Atoms of  $n$ -hexadecyloxy chains of each  $C16^{2-}$  on Fig. S11a,c are disordered over two sites with 50% occupancy. Alkyl chains on Fig. S11b,d are omitted for clarity. (C of the aromatic rings: pale green or blue, C of the alkyl chains: pale gray, O: red, Zn: pale blue)

**Table S1.** Comparison of the key cell parameters of the single crystal structures of **LT** and **HT**.

|                            | <b>LT (293 K)</b>                                 | <b>HT (450 K)</b>                                 |
|----------------------------|---------------------------------------------------|---------------------------------------------------|
| Empirical formula          | C <sub>24</sub> H <sub>36</sub> O <sub>5</sub> Zn | C <sub>24</sub> H <sub>36</sub> O <sub>5</sub> Zn |
| Crystal system             | Triclinic                                         | Monoclinic                                        |
| Space Group                | <i>P</i> −1                                       | <i>C</i> 2/m                                      |
| <i>a</i> (Å)               | 7.0651(2)                                         | 7.3454(16)                                        |
| <i>b</i> (Å)               | 9.0096(3)                                         | 16.8251(13)                                       |
| <i>c</i> (Å)               | 20.2493(5)                                        | 23.326(14)                                        |
| <i>α</i> (°)               | 78.148(5)                                         | 90                                                |
| <i>β</i> (°)               | 89.073(6)                                         | 91.95(4)                                          |
| <i>γ</i> (°)               | 69.912(5)                                         | 90                                                |
| <i>V</i> (Å <sup>3</sup> ) | 1182.65(7)                                        | 2881.1(19)                                        |
| <i>Z</i>                   | 2                                                 | 4                                                 |

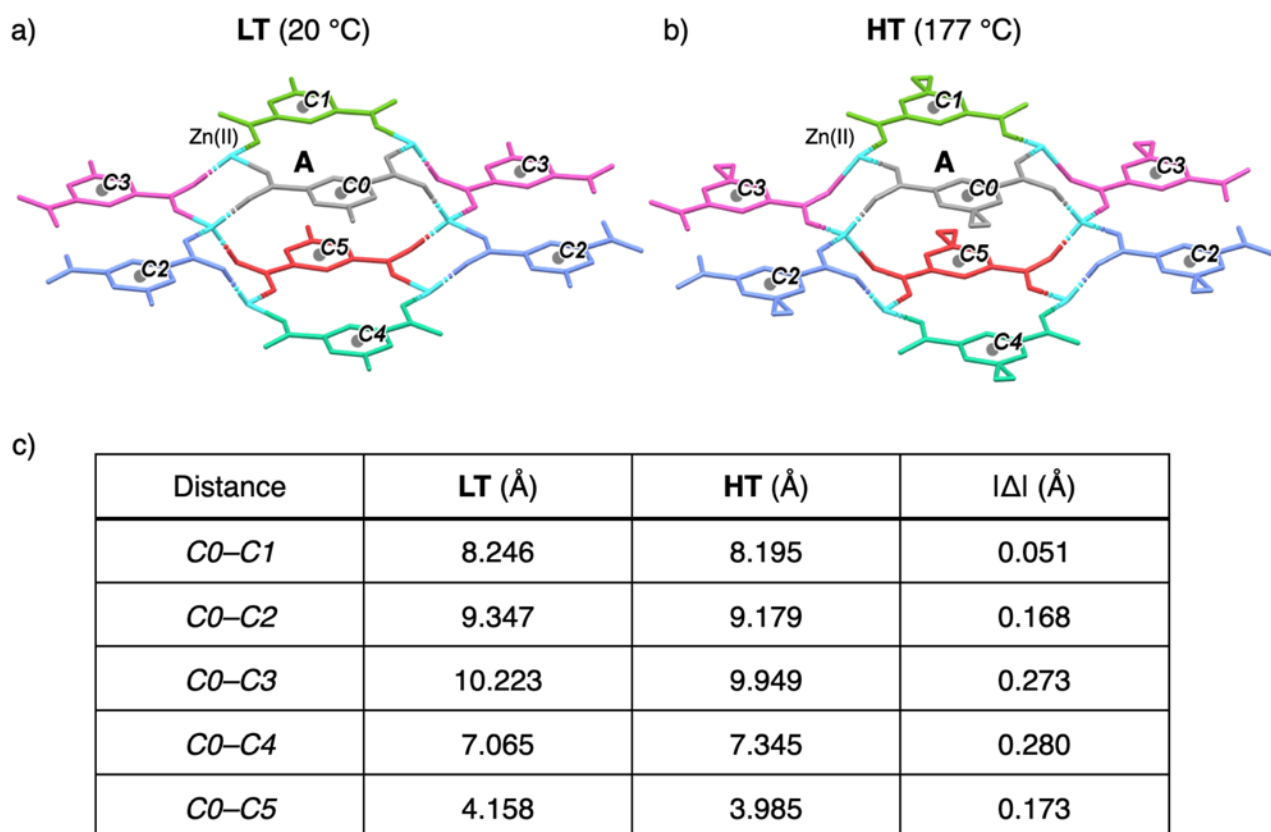

**Fig. S12** Comparison of the coordination polymer network of **LT** and **HT**. Partial crystal structures of coordination polymer network of a) **LT** (20 °C) and b) **HT** (177 °C). Alkyl chains are omitted for clarity. Ligands locating around the inequivalent relative position to the central one (marked by **A**, coloured by grey) are shown in different colours. *C0–C5* represent centroids of each aromatic rings. c) List of the distances among the centroids of aromatic rings in **LT** and **HT**, and their absolute differential values between **LT** and **HT**.

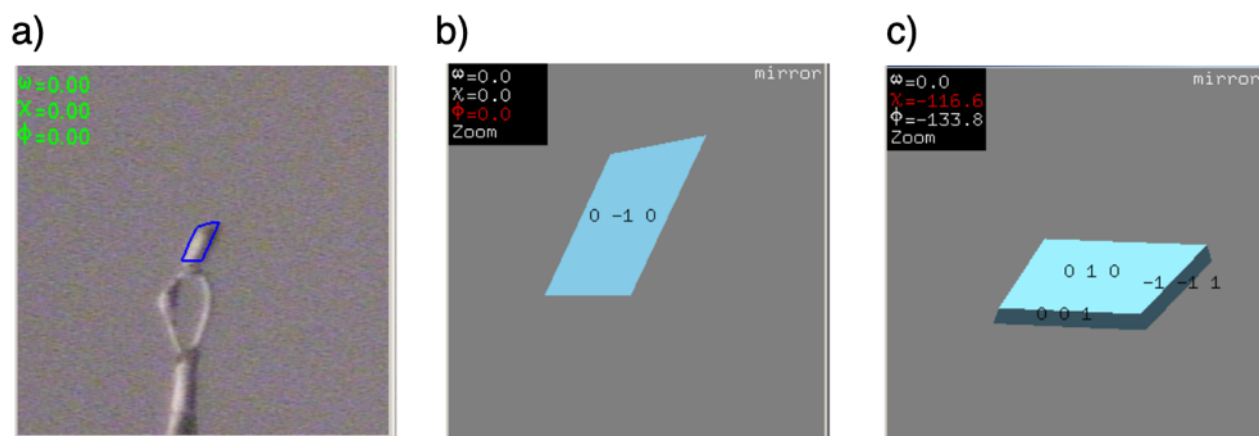

**Fig. S13** a) Photograph of a single crystal of **LT**. b-c) Face-indexing graphics of **LT**.

#### 4-6. Visual observation of coordination polymer ZnC16

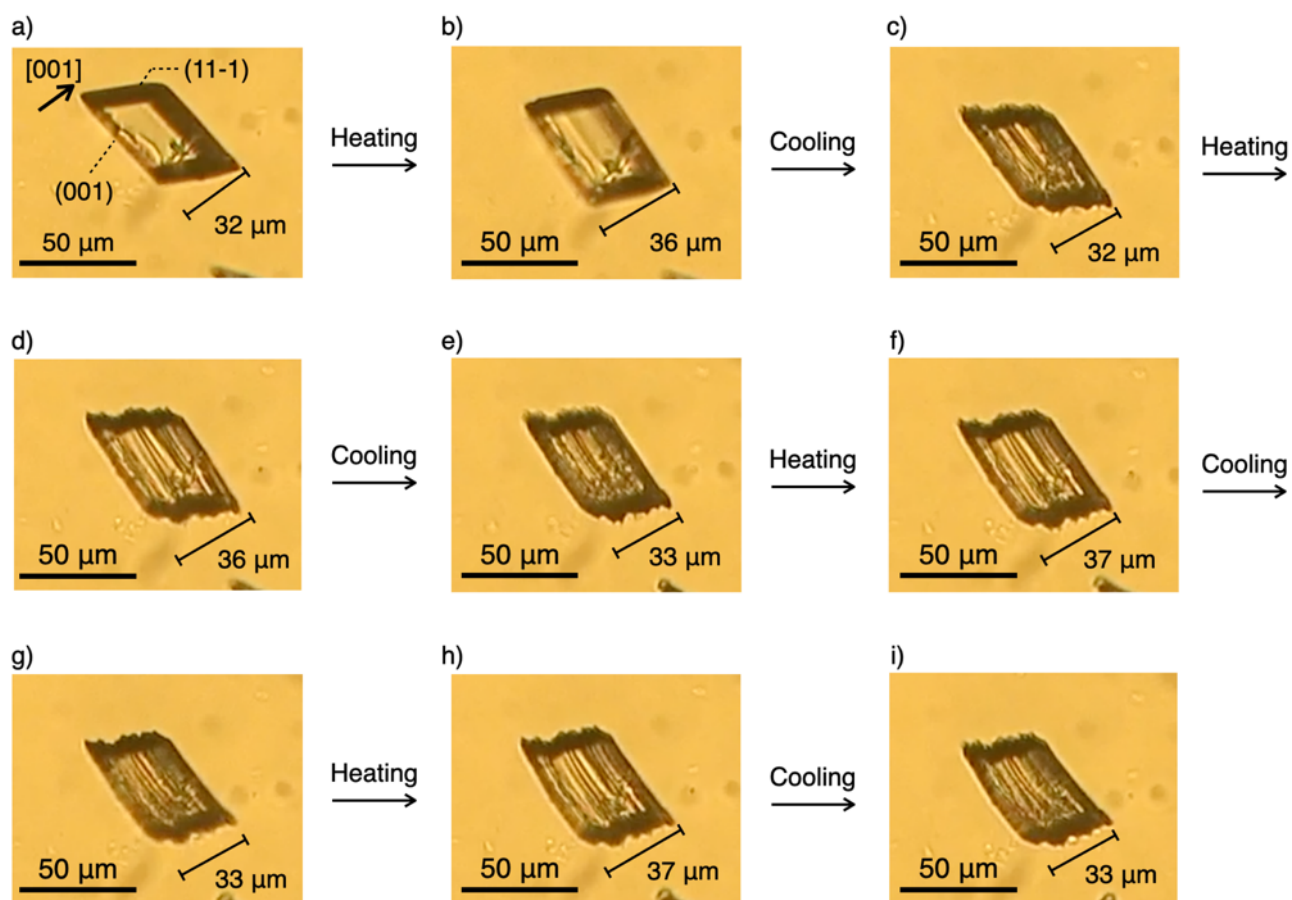

**Fig. S14** Photographs showing shape deformation of crystals of ZnC16 upon repetitive temperature increasing/decreasing cycles within the 140–160 °C window at ca. 20 °C/min (Movie S1). Captions a–i show the sequence of transition. Change in crystal thickness along [001] direction upon temperature cycles is shown in Fig S14, which were estimated by measuring the distances between the opposite (001) axis of the parallelogram shape using microscopic images.



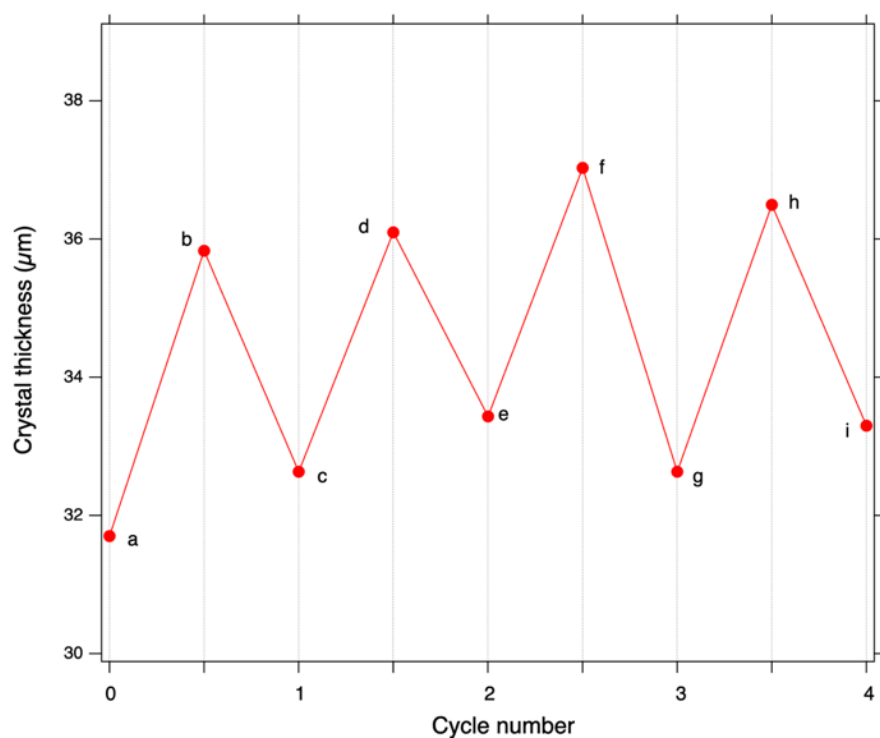

**Fig. S15** Change in crystal thickness along [001] direction upon repetitive temperature increasing/decreasing cycles within the 140–160 °C window 20 °C/min. Captions a–i locating next to the circle show the pictures of corresponding crystals in Fig. S13.

#### 4-7. DSC thermograms of coordination polymer ZnC16

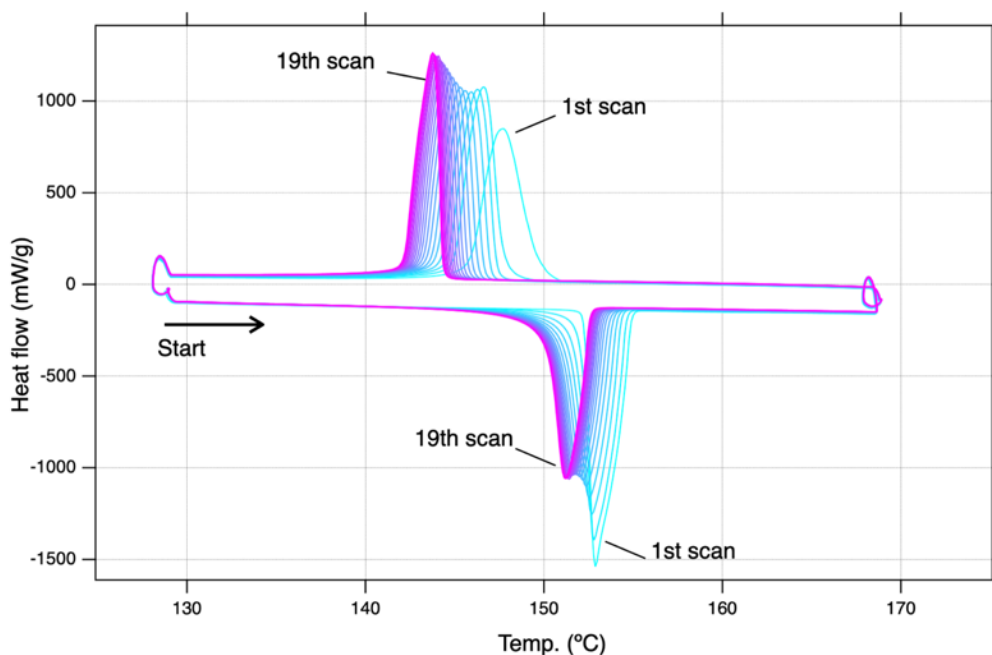

**Fig. S16** DSC thermogram of ZnC16 measured under repetitive temperature increasing/decreasing cycles within the 130–170 °C window. (scan rate 1 °C/min). Thermograms are coloured by cyan (1<sup>st</sup> scan) to magenta (19<sup>th</sup> scan) sequentially.

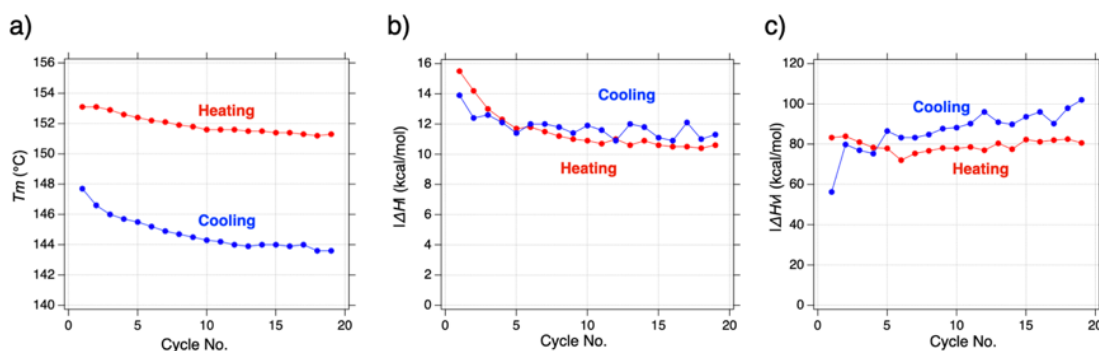

$$C_p(T) = \frac{K(T) \Delta H_v \Delta H}{(K(T) + 1)^2 RT^2} \quad \dots (1)$$

$$K(T) = \exp \left( \frac{-\Delta H_v}{RT} \left( 1 - \frac{T}{T_m} \right) \right) \quad \dots (2)$$

$C_p(T)$ : Molar heat capacity

$K(T)$ : Equilibrium constant between LT and HT

**Fig. S17** Changes in a) phase transition temperatures ( $T_m$ ), b) absolute values of transition enthalpy ( $|\Delta H|$ ), and c) absolute values of van't Hoff enthalpy ( $|\Delta H_v|$ ) estimated from the curve fitting of the DSC thermograms using eq (1) and eq (2) (Fig. S16). The error values of the curve fitting for  $T_m$ ,  $|\Delta H|$ , and  $|\Delta H_v|$  are less than 0.06 °C, 0.5 kcal/mol, and 6.0 kcal/mol respectively.

## 5. References

1. P. Reb, K. Margarit-Puri, M. Klapper and K. Müllen, *Macromolecules*, 2000, **33**, 7718–7723.
2. G. M. Sheldrick, *Acta Cryst.*, 2015, **A71**, 3–8.
3. G. M. Sheldrick, *Acta Cryst.*, 2015, **C71**, 3–8.
4. O. V. Dolomanov, L. J. Bourhis, R. J. Gildea, J. A. K. Howard and H. Puschmann, *J. Appl. Cryst.*, 2009, **42**, 339–341.
5. CrysAlisPro, version 1.171.42.56a. Rigaku Corporation, Oxford, UK, 2022.
